# Supplementary material for: R-spondin 3 deletion induces Erk phosphorylation to enhance Wnt signaling and promote bone formation in the appendicular skeleton
Source: eLife journal article supplement (doi:10.7554/elife.84171), 2022-11-02
Supplement: supp [file Figure 5b-source data 1-uncropped labelled blots.docx]

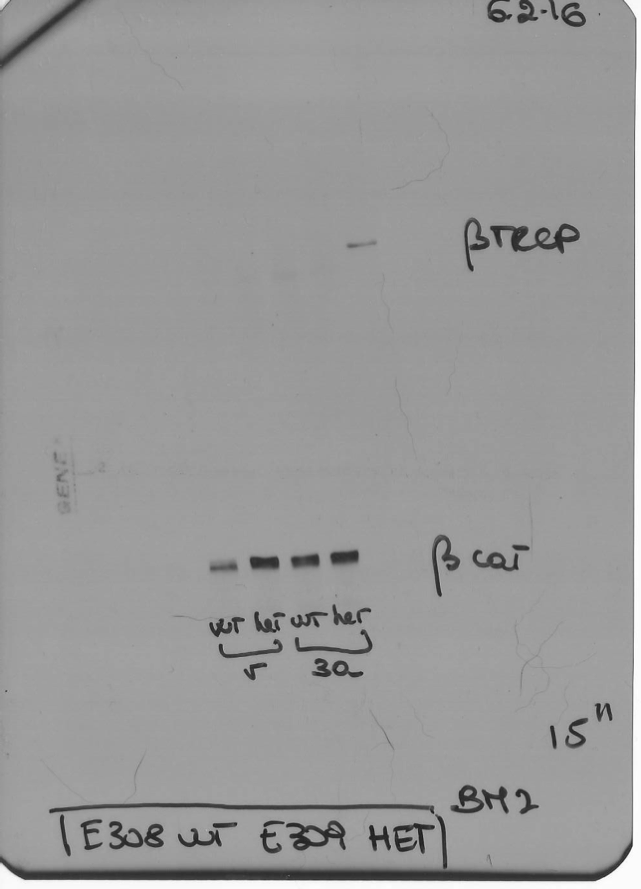


Figure 5b. Source data 1. Representative images of uncropped blots of active -catenin in BMSC isolated from *wt* and *Rspo3+/-*mice
