# Supplementary material for: R-spondin 3 deletion induces Erk phosphorylation to enhance Wnt signaling and promote bone formation in the appendicular skeleton
Source: eLife journal article supplement (doi:10.7554/elife.84171), 2022-11-02
Supplement: supp [file Figure 7c-source data 3_uncropped labelled blot.docx]

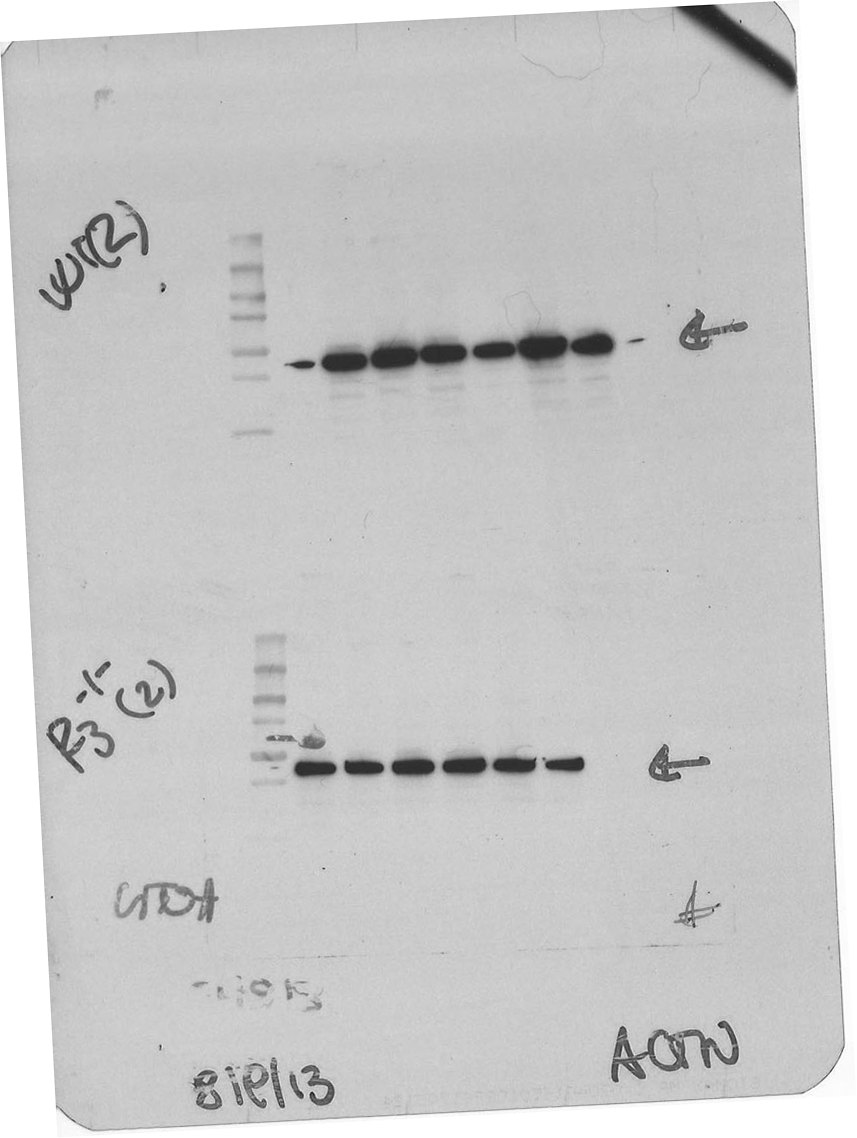


Dkk1

wnt3a

vehicle

Dkk1

wnt3a

vehicle

wt

Rspo3-/-

Representative uncropped labelled blot of actin in *wt* and *Rspo-/-*MEFs treated w/wo Wnt3a and increasing doses of Dkk1.
