# Supplementary material for: R-spondin 3 deletion induces Erk phosphorylation to enhance Wnt signaling and promote bone formation in the appendicular skeleton
Source: eLife journal article supplement (doi:10.7554/elife.84171), 2022-11-02
Supplement: supp [file Figure 8a-source data 4-uncropped label blot.docx]

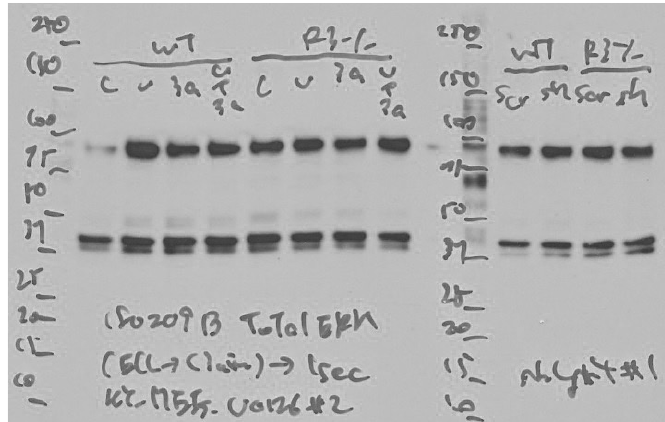


Representative uncropped labelled blot of total Erk in *wt* and *Rspo-/-*MEFs treated w/wo w/wo Wnt3a and U0126.
