# Supplementary figures and images for: R-spondin 3 deletion induces Erk phosphorylation to enhance Wnt signaling and promote bone formation in the appendicular skeleton
Source: eLife journal article supplement (doi:10.7554/elife.84171), 2022-11-02

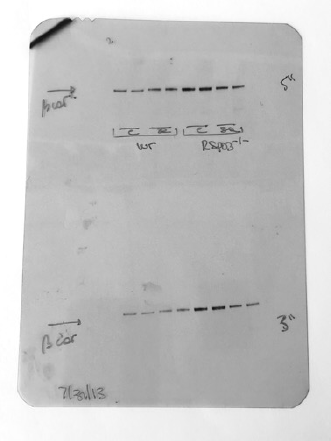


Representative uncropped labelled blot of active catenin in *wt* and *Rspo-/-*MEFs treated w/wo Wnt3a

Supplement: supp [file Figure 6b-source data 1_uncropped labelled blot.docx]

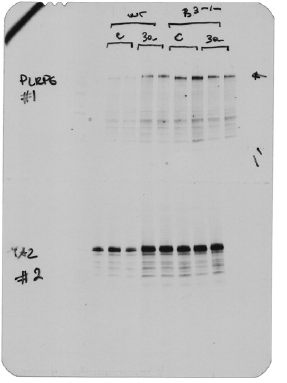


Representative uncropped labelled blot of pLrp6 in *wt* and *Rspo-/-*MEFs treated w/wo Wnt3a

Supplement: supp [file Figure 6b-source data 2_uncropped labelled blot.docx]

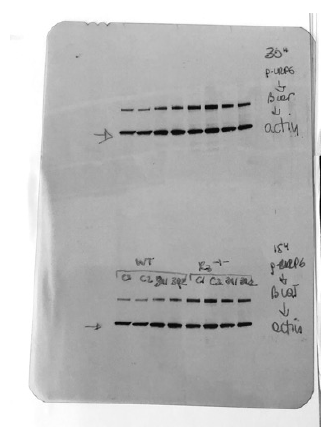


Representative uncropped labelled blot of actin in *wt* and *Rspo-/-*MEFs treated w/wo Wnt3a

Supplement: supp [file Figure 6b-source data 3_uncropped labelled blot.docx]

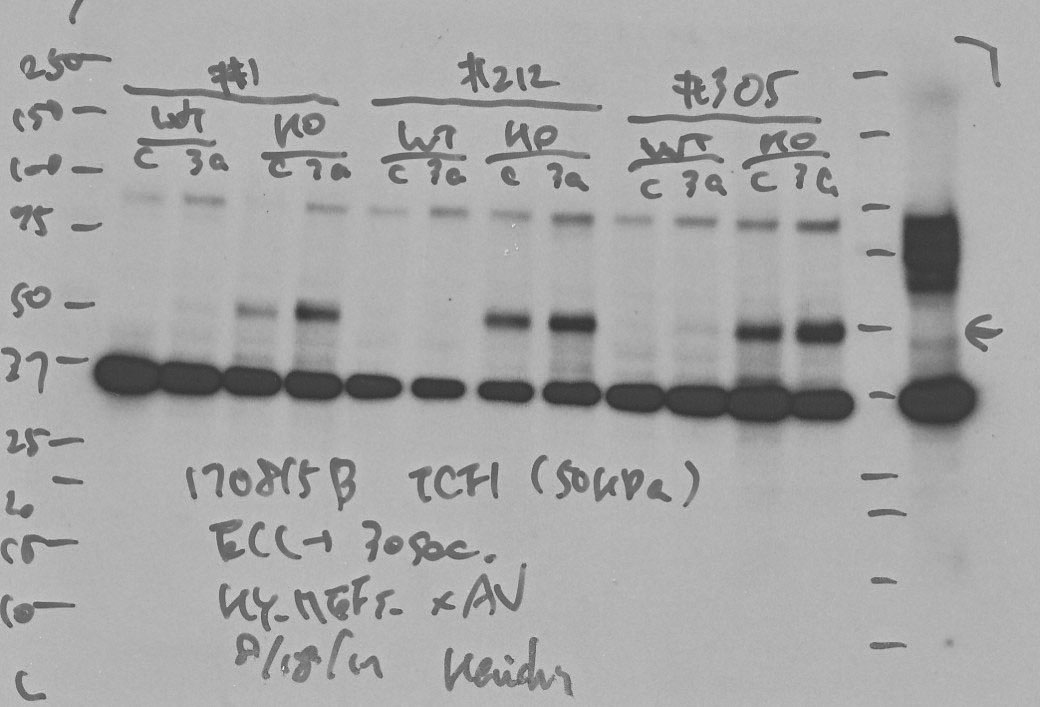


Representative uncropped labelled blot of Tcf1 in *wt* and *Rspo-/-*MEFs treated w/wo Wnt3a

Supplement: supp [file Figure 6b-source data 4_uncropped labelled blot.docx]

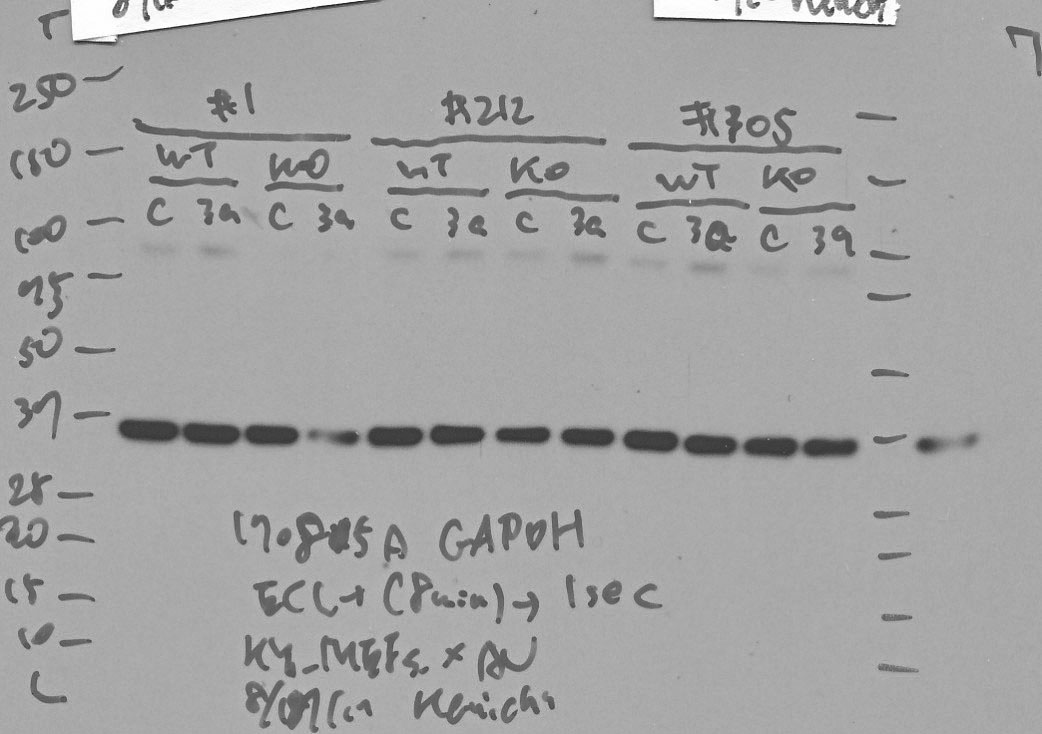


Representative uncropped labelled blot of Gapdh in *wt* and *Rspo-/-*MEFs treated w/wo Wnt3a

Supplement: supp [file Figure 6b-source data 5_uncropped labelled blot.docx]

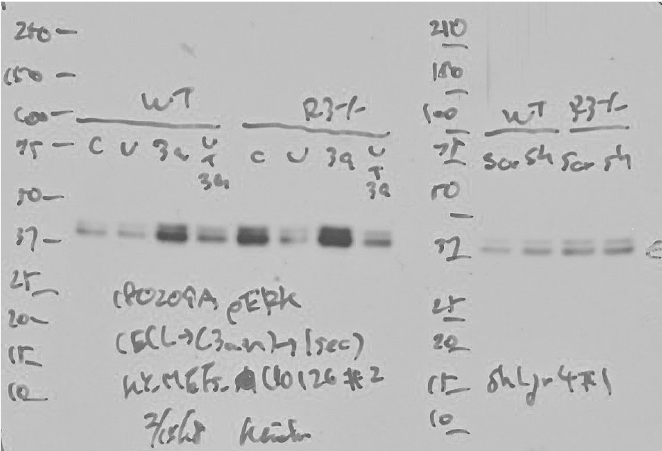


Representative uncropped labelled blot of pErk in *wt* and *Rspo-/-*MEFs treated w/wo w/wo Wnt3a and U0126.

Supplement: supp [file Figure 8a-source data 3_uncropped label blot.docx]

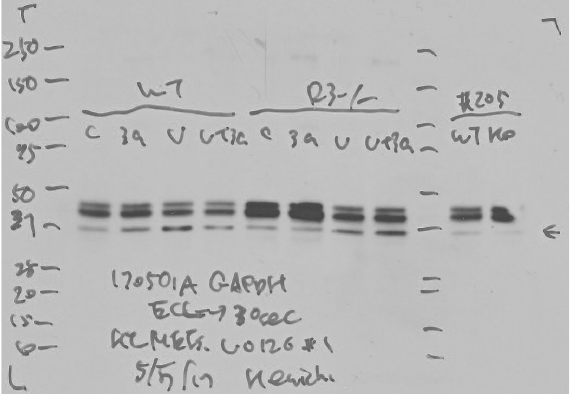


Representative uncropped labelled blot of Gapdh n *wt* and *Rspo-/-*MEFs treated w/wo w/wo Wnt3a and U0126.

Supplement: supp [file Figure 8a-source data 7-uncropped label blot.docx]

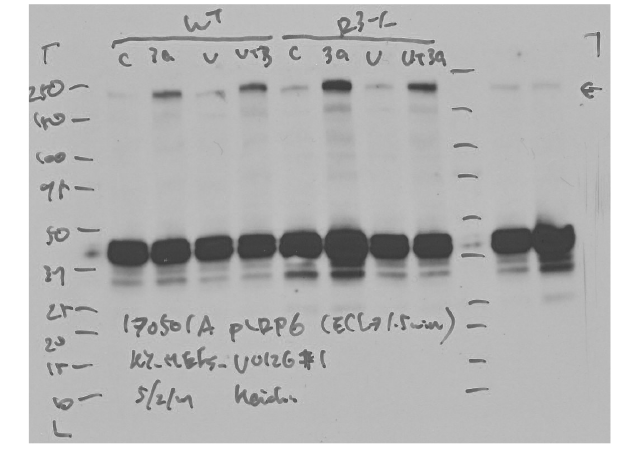


Representative uncropped labelled blot of pLrp6 n *wt* and *Rspo-/-*MEFs treated w/wo w/wo Wnt3a and U0126.

Supplement: supp [file Figure 8a-source data 5-uncropped label blot.docx]
